# Supplementary material for: Nonalcoholic Fatty Liver Disease Is Exacerbated in High-Fat Diet-Fed Gnotobiotic Mice by Colonization with the Gut Microbiota from Patients with Nonalcoholic Steatohepatitis
Source: PubMed Central journal article supplement (PMC5707692; doi:10.3390/nu9111220), 2017-11-06
Supplement: nutrients-09-01220-s001.pdf [file nutrients-09-01220-s001.pdf]

# Nonalcoholic Fatty Liver Disease Is Exacerbated in High-Fat Diet-Fed Gnotobiotic Mice by Colonization with the Gut Microbiota from Patients with Nonalcoholic Steatohepatitis

**Table S1.** Anthropometric and metabolic variables of donors.

| Variables                | Healthy donor<br>( <i>n</i> = 10) | NASH donor<br>( <i>n</i> = 10) |
|--------------------------|-----------------------------------|--------------------------------|
| Weight (kg)              | 62.3±9.3                          | 66.8±10.7                      |
| Height (cm)              | 165.0±7.7                         | 161.1±8.9                      |
| BMI (kg/m <sup>2</sup> ) | 22.8±1.5                          | 25.6±2.7                       |
| ALT (U/L)                | 28.6±14.1                         | 76.4±63.0                      |
| AST (U/L)                | 26.2±5.9                          | 63.6±41.8                      |
| TG (mg/dl)               | 108.9±20.0                        | 144.4±44.1                     |
| Chol (mg/dl)             | 189.2±18.2                        | 192.3±18.4                     |
| Glu (mg/dl)              | 90.2±4.8                          | 102.8±18.0                     |

BMI: body mass index; TG: triglycerides; Chol: cholesterol; Glu: fasting glucose.

**Table S2.** Real-time PCR primers used in this study.

| Gene (NCBI ID)                  | Orientation | Sequence (5'-3')           | UPL |
|---------------------------------|-------------|----------------------------|-----|
| TNF- $\alpha$<br>(NM_013693.2)  | Forward     | TGCCTATGTCTCAGCCTCTTC      | 49  |
|                                 | Reverse     | GAGGCCATTTGGGAATTCT        |     |
| IL-6 (NM_031168.1)              | Forward     | GCTACCAAACCTGGATATAATCAGGA | 6   |
|                                 | Reverse     | CCAGGTAGCTATGGTACTCCAGAA   |     |
| MCP-1<br>(NM_011333.3)          | Forward     | CATCCACGTGTTGGCTCA         | 62  |
|                                 | Reverse     | GATCATCTTGCTGGTGAATGAGT    |     |
| PPAR- $\gamma$<br>(NM_011146.3) | Forward     | TGCTGTTATGGGTGAAACTCTG     | 2   |
|                                 | Reverse     | CTGTGTCAACCATGGTAATTTCTT   |     |
| TLR 2 (NM_011905.3)             | Forward     | GGGGCTTCACTTCTCTGCTT       | 50  |
|                                 | Reverse     | AGCATCCTCTGAGATTTGACG      |     |
| TLR 4 (NM_021297.2)             | Forward     | GGACTCTGATCATGGCACTG       | 2   |
|                                 | Reverse     | CTGATCCATGCATTGGTAGGT      |     |
| $\beta$ -actin<br>(NM_007393.3) | Forward     | CTAAGGCCAACCGTGAAAAG       | 64  |
|                                 | Reverse     | ACCAGAGGCATACAGGGACA       |     |
